# Supplementary material
Source: PubMed Central journal article supplement (PMC8847628)
Supplement: 40121_2021_571_MOESM1_ESM.pdf [file 40121_2021_571_MOESM1_ESM.pdf]

## **Electronic Supplementary Material**

**Manuscript Title:** Brand-specific enhanced safety surveillance study of GSK's quadrivalent seasonal influenza vaccine, conducted during the COVID-19 pandemic, in Belgium, Germany and Spain, for the 2020/21 season.

**Journal:** Infectious Diseases and Therapy

**Authors:** Gaël Dos Santos<sup>1</sup>, Hao Wang<sup>2</sup>, Pooja Jindal<sup>3</sup>, Maria Rybo<sup>4</sup>, H el ene Roul<sup>5</sup>, Sridevi Pallem<sup>6</sup>, Tamara Eckermann<sup>7</sup>, Lode Godderis<sup>8,9</sup>, Xavier Mart inez G omez<sup>10</sup>, Eric Godard<sup>11</sup>, Muriel Soler<sup>12</sup>, Mitra Yousefi<sup>13</sup>, Ignacio Salamanca de la Cueva<sup>14</sup>, Ugo Nwoji<sup>13</sup>

### **Affiliations:**

<sup>1</sup>GSK, Wavre, Belgium

<sup>2</sup>GSK, Amsterdam, The Netherlands

<sup>3</sup>Parexel International, Chandigarh, India , C/O GSK, Rockville, MD, USA

<sup>4</sup>PPD, Sundbyberg, Sweden

<sup>5</sup>Keyrus Life Science, Levallois-Perret, France, C/O GSK, Wavre, Belgium

<sup>6</sup>Keyrus Life Science, New York, NY, USA, C/O GSK, New York, NY, USA

<sup>7</sup>Hausarztpraxis Heimeranplatz, Munich, Germany

<sup>8</sup>Environment and Health, Department of Public Health and Primary Care, KU Leuven, Leuven, Belgium

<sup>9</sup>IDEWE, External Service for Prevention and Protection at Work, Heverlee, Belgium

<sup>10</sup>Hospital Universitari Vall d'Hebron, Barcelona, Spain

<sup>11</sup>PPD, Brussels, Belgium

<sup>12</sup>4Clinics, Waterloo, Belgium, C/O GSK, Wavre, Belgium

<sup>13</sup>GSK, Rockville, MD, USA

<sup>14</sup>Instituto Hispalense de Pediatr a, Sevilla, Spain

**Corresponding author:** Gael Dos Santos

GSK, 20 Fleming Avenue, 1300 Wavre, Belgium

Email: gael.x.dos-santos@gsk.com

Telephone: +32 1085 9141

**Fig. S1 Number of enrolled participants by ISO week, post-Dose 1 or post-Dose 2, and by country (Safety set)**

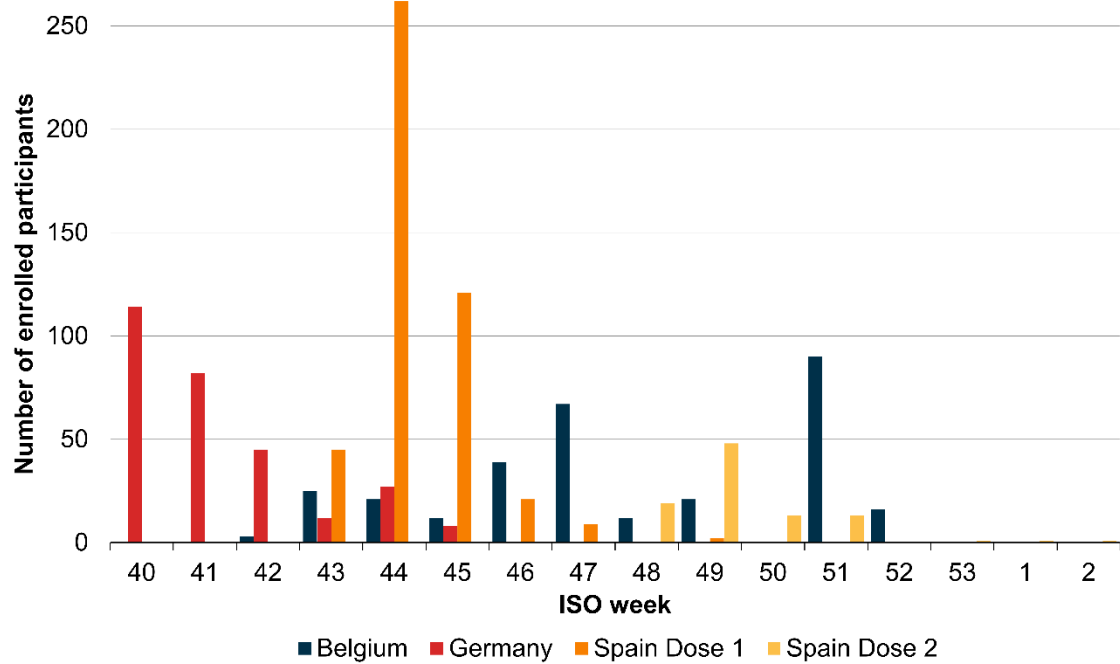

ISO: International Organization for Standardization

Participants were enrolled from ISO week 40, 2020 (28 September – 4 October 2020) to ISO week 2, 2021 (11 – 17 January 2021)

**Table S1. Vaccines co-administered with GSK's IIV4 (Safety set)**

| GSK<br>IIV4   | Co-administered<br>vaccine class <sup>a</sup> | Belgium<br>N=306 |            | Germany<br>N=288 |            | Spain<br>N=460        |             | Total<br>N=1054       |            |
|---------------|-----------------------------------------------|------------------|------------|------------------|------------|-----------------------|-------------|-----------------------|------------|
|               |                                               | n                | %          | n                | %          | n                     | %           | n                     | %          |
| <b>Dose 1</b> | <b>Any</b>                                    | <b>4</b>         | <b>1.3</b> | <b>4</b>         | <b>1.4</b> | <b>83</b>             | <b>18.0</b> | <b>91</b>             | <b>8.6</b> |
|               | Bacterial + Viral                             | 0                | 0.0        | 0                | 0.0        | 7                     | 1.5         | 7                     | 0.7        |
|               | Bacterial                                     | 0                | 0.0        | 0                | 0.0        | 1                     | 0.2         | 1                     | 0.1        |
|               | Encephalitis                                  | 0                | 0.0        | 4                | 1.4        | 0                     | 0.0         | 4                     | 0.4        |
|               | Hib                                           | 0                | 0.0        | 0                | 0.0        | 1                     | 0.2         | 1                     | 0.1        |
|               | Hepatitis                                     | 0                | 0.0        | 0                | 0.0        | 49                    | 10.7        | 49                    | 4.6        |
|               | Meningococcal                                 | 0                | 0.0        | 0                | 0.0        | 4                     | 0.9         | 4                     | 0.4        |
|               | Multiple                                      | 0                | 0.0        | 0                | 0.0        | 2                     | 0.4         | 2                     | 0.2        |
|               | Other Bacterial                               | 0                | 0.0        | 0                | 0.0        | 20                    | 4.3         | 20                    | 1.9        |
|               | Other Viral                                   | 0                | 0.0        | 0                | 0.0        | 6                     | 1.3         | 6                     | 0.6        |
|               | Papillomavirus                                | 0                | 0.0        | 0                | 0.0        | 2                     | 0.4         | 2                     | 0.2        |
|               | Pertussis                                     | 0                | 0.0        | 0                | 0.0        | 2                     | 0.4         | 2                     | 0.2        |
|               | Pneumococcal                                  | 4                | 1.3        | 0                | 0.0        | 32                    | 7.0         | 36                    | 3.4        |
|               | Poliomyelitis                                 | 0                | 0.0        | 0                | 0.0        | 1                     | 0.2         | 1                     | 0.1        |
|               | Varicella Zoster                              | 0                | 0.0        | 0                | 0.0        | 3                     | 0.7         | 3                     | 0.3        |
| Viral         | 0                                             | 0.0              | 0          | 0.0              | 1          | 0.2                   | 1           | 0.1                   |            |
|               |                                               |                  |            |                  |            | <b>Spain<br/>N=96</b> |             | <b>Total<br/>N=96</b> |            |
| <b>Dose 2</b> | <b>Any</b>                                    |                  |            |                  |            | <b>0</b>              | <b>0.0</b>  | <b>0</b>              | <b>0.0</b> |

<sup>a</sup>Vaccination classes coded using GSK's Drug Dictionary

Hib: *Haemophilus influenzae* B; IIV4: inactivated quadrivalent seasonal influenza vaccine; N: number of participants vaccinated with GSK's IIV4; n/%: number/percentage of participants who received the specified co-administered vaccine on the same day as GSK's IIV4

**Table S2. COVID-19 suspected, probable and confirmed infections (Safety set)**

| <b>COVID-19 test</b>            | <b>COVID-19 infection<sup>a</sup></b> | <b>Belgium<br/>N=306</b> | <b>Germany<br/>N=288</b> | <b>Spain<br/>N=460</b> | <b>Total<br/>N=1054</b> |
|---------------------------------|---------------------------------------|--------------------------|--------------------------|------------------------|-------------------------|
|                                 |                                       | <b>n (%)</b>             | <b>n (%)</b>             | <b>n (%)</b>           | <b>n (%)</b>            |
| During the study <sup>b</sup>   | Confirmed                             | 0 (0.0)                  | 0 (0.0)                  | 1 (0.2)                | 1 (0.1)                 |
|                                 | Probable                              | 0 (0.0)                  | 0 (0.0)                  | 0 (0.0)                | 0 (0.0)                 |
|                                 | Suspected                             | 2 (0.7)                  | 0 (0.0)                  | 1 (0.2)                | 3 (0.3)                 |
| Before the study <sup>c</sup>   | Confirmed                             | 1 (0.3)                  | 0 (0.0)                  | 1 (0.2)                | 2 (0.2)                 |
|                                 | Probable                              | 0 (0.0)                  | 0 (0.0)                  | 0 (0.0)                | 0 (0.0)                 |
|                                 | Suspected                             | 11 (3.6)                 | 0 (0.0)                  | 0 (0.0)                | 11 (1.0)                |
| <b>Total (among tested)</b>     | <b>Any COVID-19 infection</b>         | <b>14 (4.6)</b>          | <b>0 (0.0)</b>           | <b>3 (0.7)</b>         | <b>17 (1.6)</b>         |
| Not tested                      | Confirmed                             | 1 (0.3)                  | 0 (0.0)                  | 0 (0.0)                | 1 (0.1)                 |
|                                 | Probable                              | 0 (0.0)                  | 0 (0.0)                  | 1 (0.2)                | 1 (0.1)                 |
|                                 | Suspected                             | 2 (0.7)                  | 0 (0.0)                  | 1 (0.2)                | 3 (0.3)                 |
| <b>Total (among not tested)</b> | <b>Any COVID-19 infection</b>         | <b>3 (1.0)</b>           | <b>0 (0.0)</b>           | <b>2 (0.4)</b>         | <b>5 (0.5)</b>          |

<sup>a</sup>COVID-19 case definition is based on World health organization case definitions as of 20 March 2020;

<sup>b</sup>COVID-19 test performed after informed consent date; <sup>c</sup>COVID-19 test performed before informed consent date

COVID-19: coronavirus disease 2019; N: number of participants; n (%): number (percentage) of participants in a given category

**Table S3. Cumulative participants (%) reporting AEs post-Dose 2 by week (Safety set)**

| ISO weeks          | Spain N=460 |           |                  |
|--------------------|-------------|-----------|------------------|
|                    | N           | n (%)     | 95% CI,<br>LL-UL |
| 40-48              | 19          | 1 (5.3)   | 0.1-26.0         |
| 40-49              | 67          | 9 (13.4)  | 6.3-24.0         |
| 40-50              | 80          | 11 (13.8) | 7.1-23.3         |
| 40-51              | 93          | 13 (14.0) | 7.7-22.7         |
| 40-52              | 93          | 13 (14.0) | 7.7-22.7         |
| 40-53              | 94          | 13 (13.8) | 7.6-22.5         |
| 40-01 <sup>a</sup> | 95          | 13 (13.7) | 7.5-22.3         |
| 40-02 <sup>a</sup> | 96          | 13 (13.5) | 7.4-22.0         |

<sup>a</sup>ISO week of 2021

AE: adverse event; ISO: International Organization for Standardization; N: number of participants vaccinated with GSK's inactivated quadrivalent seasonal influenza vaccine (IIV4) in the specified ISO weeks who received an adverse drug reaction (ADR) card; n (%): number (percentage) of participants vaccinated with GSK's IIV4 in the specified ISO week reporting at least one symptom on their ADR card; 95% CI, LL-UL: 95% confidence interval (Clopper-Pearson exact CI not extended for clustered data), lower limit-upper limit

**Table S4. Cumulative participants (%) reporting AEs by severity after each dose (all countries) or both doses (Spain) (Safety set)**

| Severity grade <sup>a</sup>            | Belgium<br>N=306 |                                | Germany<br>N=288 |                               | Spain<br>N=460 |                                  | Total<br>N=1054 |                                 |
|----------------------------------------|------------------|--------------------------------|------------------|-------------------------------|----------------|----------------------------------|-----------------|---------------------------------|
|                                        | n*<br>AEs        | n (%)<br>95% CI,<br>LL-UL      | n*<br>AEs        | n (%)<br>95% CI,<br>LL-UL     | n*<br>AEs      | n (%)<br>95% CI,<br>LL-UL        | n*<br>AEs       | n (%)<br>95% CI, LL-<br>UL      |
| <b>Post-Dose 1</b>                     |                  |                                |                  |                               |                |                                  |                 |                                 |
| <b>Any AE</b>                          | <b>214</b>       | <b>113 (36.9)<br/>8.8-74.1</b> | <b>315</b>       | <b>97 (33.7)<br/>6.6-72.8</b> | <b>418</b>     | <b>188 (40.9)<br/>0.0-99.9</b>   | <b>947</b>      | <b>398 (37.8)<br/>29.0-47.2</b> |
| Mild                                   | 172              | 81 (26.5)<br>2.4-71.8          | 202              | 52 (18.1)<br>5.4-39.2         | 236            | 107 (23.3)<br>0.7-76.8           | 610             | 240 (22.8)<br>17.2-29.2         |
| Moderate                               | 41               | 31 (10.1)<br>7.0-14.1          | 100              | 40 (13.9)<br>1.9-40.8         | 134            | 55 (12.0)<br>0.0-63.6            | 275             | 126 (12.0)<br>9.0-15.5          |
| Severe                                 | 1                | 1 (0.3)<br>0.0-10.4            | 13               | 5 (1.7)<br>0.1-8.7            | 39             | 23 (5.0)<br>0.0-97.5             | 53              | 29 (2.8)<br>0.6-7.6             |
| Missing                                | 0                | 0 (0.0)<br>0.0-1.2             | 0                | 0 (0.0)<br>0.0-1.3            | 9              | 3 (0.7)<br>0.0-35.9              | 9               | 3 (0.3)<br>0.0-1.5              |
| <b>Post-Dose 2: Spain N=96</b>         |                  |                                |                  |                               |                |                                  |                 |                                 |
| <b>Any AE</b>                          | -                | -                              | -                | -                             | <b>19</b>      | <b>13 (13.5)<br/>7.4-22.0</b>    |                 |                                 |
| Mild                                   | -                | -                              | -                | -                             | 11             | 8 (8.3)<br>3.7-15.8              |                 |                                 |
| Moderate                               | -                | -                              | -                | -                             | 6              | 3 (3.1)<br>0.7-8.9               |                 |                                 |
| Severe                                 | -                | -                              | -                | -                             | 2              | 2 (2.1)<br>0.3-7.3               |                 |                                 |
| <b>Post-Doses 1 and 2: Spain N=460</b> |                  |                                |                  |                               |                |                                  |                 |                                 |
| <b>Any AE</b>                          | -                | -                              | -                | -                             | <b>437</b>     | <b>193 (42.0)<br/>0.0-99.8</b>   |                 |                                 |
| Mild                                   | -                | -                              | -                | -                             | 247            | 110 (23.9)<br>1.7-69.9           |                 |                                 |
| Moderate                               | -                | -                              | -                | -                             | 140            | 56 (12.2)<br>0.1-59.6            |                 |                                 |
| Severe                                 | -                | -                              | -                | -                             | 41             | 25 (5.4)<br>0.0-94.3             |                 |                                 |
| Missing                                | -                | -                              | -                | -                             | 9              | 2 (0.4) <sup>b</sup><br>0.0-25.6 |                 |                                 |

*None of the events reported were classified as potentially life-threatening<sup>a</sup>*

<sup>a</sup>**Mild:** symptoms causing no or minimal interference with usual social and functional activities with intervention not indicated; **Moderate:** symptoms causing greater than minimal interference with usual social and functional activities with intervention indicated; **Severe:** symptoms causing inability to perform usual social and functional activities with intervention or hospitalization indicated; **Potentially life-threatening:** symptoms causing inability to perform basic self-care functions with intervention indicated to prevent permanent impairment, persistent disability, or death

<sup>b</sup>Of the three participants with missing severity data post-Dose 1 in Spain, one participant was classified as “moderate” severity post-Dose 2; therefore, only two participants remain with missing data post-Doses 1 and 2

AE: adverse event; N: number of participants vaccinated with GSK’s inactivated quadrivalent seasonal influenza vaccine (IIV4) who received an adverse drug reaction (ADR) card; n\*: number of AEs reported by severity grade; n (%): number (percentage) of participants vaccinated with GSK’s IIV4 per severity grade, considering the more severe report in case of multiple reports; 95% CI, LL-UL: 95% confidence interval (extended Clopper-Pearson exact CI for clustered data) lower limit-upper limit

**Table S5. Cumulative participants (%) reporting AEs (in italics) and/or other AEs post-Doses 1 and 2 classified by MedDRA Primary System Organ Class over the study period - Spain (Safety set)**

| MedDRA Primary System Organ Class (Code)<br>Preferred Term (Code)          | Spain N=460    |            |                        |
|----------------------------------------------------------------------------|----------------|------------|------------------------|
|                                                                            | n <sup>a</sup> | n          | % [95% CI, LL-UL]      |
| <b>Any</b>                                                                 | <b>437</b>     | <b>193</b> | <b>42.0 [0.0-99.8]</b> |
| <b>General disorders and administration site conditions<br/>(10018065)</b> | <b>271</b>     | <b>166</b> | <b>36.1 [0.0-99.9]</b> |
| <i>Injection site pain (10022086)</i>                                      | 149            | 144        | 31.3 [0.0-99.8]        |
| <i>Injection site swelling (10053425)</i>                                  | 40             | 40         | 8.7 [0.0-98.3]         |
| <i>Fatigue (10016256)</i>                                                  | 30             | 29         | 6.3 [0.0-98.0]         |
| <i>Injection site erythema (10022061)</i>                                  | 24             | 24         | 5.2 [0.0-51.2]         |
| <i>Pyrexia (10037660)</i>                                                  | 15             | 15         | 3.3 [0.1-16.3]         |
| <i>Chills (10008531)</i>                                                   | 13             | 13         | 2.8 [0.0-91.8]         |
| <b>Nervous system disorders (10029205)</b>                                 | <b>40</b>      | <b>36</b>  | <b>7.8 [0.0-100.0]</b> |
| <i>Headache (10019211)</i>                                                 | 34             | 34         | 7.4 [0.0-100.0]        |
| <i>Dizziness (10013573)</i>                                                | 5              | 5          | 1.1 [0.0-78.8]         |
| <i>Clumsiness (10009696)</i>                                               | 1              | 1          | 0.2 [0.0-45.9]         |
| <b>Gastrointestinal disorders (10017947)</b>                               | <b>36</b>      | <b>25</b>  | <b>5.4 [0.0-49.9]</b>  |
| <i>Diarrhoea (10012735)</i>                                                | 14             | 13         | 2.8 [0.0-45.0]         |
| <i>Vomiting (10047700)</i>                                                 | 11             | 11         | 2.4 [0.0-30.7]         |
| <i>Nausea (10028813)</i>                                                   | 11             | 11         | 2.4 [0.0-26.0]         |
| <b>Musculoskeletal and connective tissue disorders (10028395)</b>          | <b>33</b>      | <b>24</b>  | <b>5.2 [0.0-100.0]</b> |
| <i>Myalgia (10028411)</i>                                                  | 21             | 21         | 4.6 [0.0-99.7]         |
| <i>Arthralgia (10003239)</i>                                               | 9              | 9          | 2.0 [0.0-92.4]         |
| <i>Pain in extremity (10033425)</i>                                        | 2              | 2          | 0.4 [0.0-8.6]          |
| <i>Limb discomfort (10061224)</i>                                          | 1              | 1          | 0.2 [0.0-45.9]         |
| <b>Respiratory, thoracic and mediastinal disorders (10038738)</b>          | <b>24</b>      | <b>16</b>  | <b>3.5 [2.0-5.6]</b>   |
| <i>Rhinorrhoea (10039101)</i>                                              | 12             | 12         | 2.6 [0.0-17.2]         |
| <i>Cough (10011224)</i>                                                    | 5              | 5          | 1.1 [0.0-12.2]         |



|                                                          |           |           |                       |
|----------------------------------------------------------|-----------|-----------|-----------------------|
| Nasal congestion (10028735)                              | 4         | 4         | 0.9 [0.0-4.7]         |
| Sneezing (10041232)                                      | 2         | 2         | 0.4 [0.0-25.6]        |
| Pharyngeal swelling (10082270)                           | 1         | 1         | 0.2 [0.0-45.9]        |
| <b>Metabolism and nutrition disorders (10027433)</b>     | <b>13</b> | <b>13</b> | <b>2.8 [1.5-4.8]</b>  |
| <i>Decreased appetite (10061428)</i>                     | <i>13</i> | <i>13</i> | <i>2.8 [1.5-4.8]</i>  |
| <b>Skin and subcutaneous tissue disorders (10040785)</b> | <b>10</b> | <b>9</b>  | <b>2.0 [0.0-15.9]</b> |
| <i>Pruritus (10037087)</i>                               | <i>7</i>  | <i>7</i>  | <i>1.5 [0.4-4.0]</i>  |
| <i>Rash (10037844)</i>                                   | <i>2</i>  | <i>2</i>  | <i>0.4 [0.0-25.6]</i> |
| Eczema (10014184)                                        | 1         | 1         | 0.2 [0.0-13.7]        |
| <b>Psychiatric disorders (10037175)</b>                  | <b>7</b>  | <b>7</b>  | <b>1.5 [0.0-29.8]</b> |
| <i>Irritability (10022998)</i>                           | <i>7</i>  | <i>7</i>  | <i>1.5 [0.0-29.8]</i> |
| <b>Infections and infestations (10021881)</b>            | <b>2</b>  | <b>2</b>  | <b>0.4 [0.0-8.6]</b>  |
| Nasopharyngitis (10028810)                               | 1         | 1         | 0.2 [0.0-45.9]        |
| Suspected COVID-19 (10084451)                            | 1         | 1         | 0.2 [0.0-13.7]        |
| <b>Eye disorders (10015919)</b>                          | <b>1</b>  | <b>1</b>  | <b>0.2 [0.0-45.9]</b> |
| <i>Eye allergy (10015907)</i>                            | <i>1</i>  | <i>1</i>  | <i>0.2 [0.0-45.9]</i> |

In italics: predefined adverse events of interest (AEIs) listed on the adverse drug reaction (ADR) card

AE: adverse event; Any: at least one symptom experienced (regardless of the MedDRA preferred term) under the specified system organ class; COVID-19: coronavirus disease 2019; MedDRA: Medical Dictionary for Regulatory Activities; N: total number of participants vaccinated with at least one dose of GSK's inactivated quadrivalent seasonal influenza vaccine (IIV4) and who received the corresponding ADR card; n<sup>a</sup>: number of specified AEs reported considering both ADR cards; n/%: number/percentage of participants vaccinated with at least one dose of GSK's IIV4 reporting the symptom at least once considering both ADR cards; 95% CI, LL-UL: 95% confidence interval (extended Clopper-Pearson exact CI for clustered data), lower limit-upper limit

**Table S6. Cumulative participants (%) with or without co-administered vaccination, reporting AEs (italics) and/or other AEs post-Dose 1 classified by MedDRA Primary System Organ Class over the study period (Spain, Safety set)**

| <b>MedDRA Primary System Organ Class (Code)<br/>Preferred Term (Code)</b>                   | <b>Co-administration<br/>N=83<br/><br/>n (%)<br/>95% CI, LL-UL</b> | <b>No co-administration<br/>N=377<br/><br/>n (%)<br/>95% CI, LL-UL</b> |
|---------------------------------------------------------------------------------------------|--------------------------------------------------------------------|------------------------------------------------------------------------|
| <b>Any</b>                                                                                  | <b>42 (50.6)<br/>39.4-61.8</b>                                     | <b>146 (38.7)<br/>0.1-99.2</b>                                         |
| <b>General disorders and administration site conditions<br/>(10018065)</b>                  | <b>37 (44.6)<br/>33.7-55.9</b>                                     | <b>124 (32.9)<br/>0.0-99.8</b>                                         |
| <i>Injection site pain (10022086)</i>                                                       | 29 (34.9)<br>24.8-46.2                                             | 113 (30.0)<br>0.0-99.9                                                 |
| <i>Injection site swelling (10053425)</i>                                                   | 14 (16.9)<br>9.5-26.7                                              | 23 (6.1)<br>0.0-86.8                                                   |
| <i>Fatigue (10016256)</i>                                                                   | 9 (10.8)<br>5.1-19.6                                               | 19 (5.0)<br>0.0-95.3                                                   |
| <i>Injection site erythema (10022061)</i>                                                   | 9 (10.8)<br>5.1-19.6                                               | 15 (4.0)<br>0.8-11.3                                                   |
| <i>Chills (10008531)</i>                                                                    | 9 (10.8)<br>5.1-19.6                                               | 4 (1.1)<br>0.0-20.6                                                    |
| <i>Pyrexia (10037660)</i>                                                                   | 3 (3.6)<br>0.8-10.2                                                | 12 (3.2)<br>0.1-15.4                                                   |
| <b>Gastrointestinal disorders (10017947)</b>                                                | <b>5 (6.0)<br/>2.0-13.5</b>                                        | <b>19 (5.0)<br/>0.0-68.9</b>                                           |
| <i>Nausea (10028813)</i>                                                                    | 5 (6.0)<br>2.0-13.5                                                | 6 (1.6)<br>0.0-29.5                                                    |
| <i>Diarrhoea (10012735)</i>                                                                 | 2 (2.4)<br>0.3-8.4                                                 | 11 (2.9)<br>0.0-48.0                                                   |
| <i>Vomiting (10047700)</i>                                                                  | 2 (2.4)<br>0.3-8.4                                                 | 8 (2.1)<br>0.0-37.5                                                    |
| <b>Nervous system disorders (10029205)</b>                                                  | <b>19 (22.9)<br/>14.4-33.4</b>                                     | <b>17 (4.5)<br/>0.0-93.0</b>                                           |
| <i>Headache (10019211)</i>                                                                  | 19 (22.9)<br>14.4-33.4                                             | 15 (4.0)<br>0.0-74.7                                                   |
| <i>Dizziness (10013573); Clumsiness (10009696)</i>                                          | 2; 0<br>NR                                                         | 3; 1<br>NR                                                             |
| <b>Musculoskeletal and connective tissue disorders<br/>(10028395)</b>                       | <b>10 (12.1)<br/>5.9-21.0</b>                                      | <b>14 (3.7)<br/>0.0-99.5</b>                                           |
| <i>Myalgia (10028411)</i>                                                                   | 9 (10.8)<br>5.1-19.6                                               | 12 (3.2)<br>0.0-96.9                                                   |
| <i>Arthralgia (10003239)</i>                                                                | 4 (4.8)<br>1.3-11.9                                                | 5 (1.3)<br>0.0-78.0                                                    |
| <i>Pain in extremity (10033425); Limb discomfort (10061224)</i>                             | 0; 0<br>NR                                                         | 2; 1<br>NR                                                             |
| <b>Respiratory, thoracic and mediastinal disorders<br/>(10038738)</b>                       | <b>2 (2.4)<br/>0.3-8.4</b>                                         | <b>12 (3.2)<br/>0.1-15.4</b>                                           |
| <i>Rhinorrhoea (10039101)</i>                                                               | 2 (2.4)<br>0.3-8.4                                                 | 8 (2.1)<br>0.0-43.4                                                    |
| <i>Cough (10011224)</i>                                                                     | 1 (1.2)<br>0.0-6.5                                                 | 4 (1.1)<br>0.0-20.6                                                    |
| <i>Nasal congestion (10028735); Sneezing (10041232);<br/>Pharyngeal swelling (10082270)</i> | 1; 0; 1<br>NR                                                      | 3; 2; 0<br>NR                                                          |
| <b>Metabolism and nutrition disorders (10027433)</b>                                        | <b>4 (4.8)<br/>1.3-11.9</b>                                        | <b>8 (2.1)<br/>0.0-37.5</b>                                            |

|                                                                  |                                   |                                   |
|------------------------------------------------------------------|-----------------------------------|-----------------------------------|
| <i>Decreased appetite (10061428)</i>                             | <i>4 (4.8)</i><br><i>1.3-11.9</i> | <i>8 (2.1)</i><br><i>0.0-37.5</i> |
| <b>Skin and subcutaneous tissue disorders (10040785)</b>         | <b>2 (2.4)</b><br><b>0.3-8.4</b>  | <b>6 (1.6)</b><br><b>0.0-29.5</b> |
| <i>Pruritus (10037087)</i>                                       | <i>2 (2.4)</i><br><i>0.3-8.4</i>  | <i>4 (1.1)</i><br><i>0.0-20.6</i> |
| <i>Rash (10037844); Eczema (10014184)</i>                        | <i>0; 0</i><br><i>NR</i>          | <i>2; 1</i><br><i>NR</i>          |
| <b>Psychiatric disorders (10037175)</b>                          | <b>1 (1.2)</b><br><b>0.0-6.5</b>  | <b>5 (1.3)</b><br><b>0.0-25.2</b> |
| <i>Irritability (10022998)</i>                                   | <i>1 (1.2)</i><br><i>0.0-6.5</i>  | <i>5 (1.3)</i><br><i>0.0-25.2</i> |
| <b>Infections and infestations (10021881)</b>                    | <b>1 (1.2)</b><br><b>0.0-6.5</b>  | <b>1 (0.3)</b><br><b>0.0-5.6</b>  |
| <i>Suspected COVID-19 (10084451); Nasopharyngitis (10028810)</i> | <i>0; 1</i><br><i>NR</i>          | <i>1; 0</i><br><i>NR</i>          |
| <b>Eye disorders (10015919)</b>                                  | <b>0 (0.0)</b><br><b>0.0-4.4</b>  | <b>1 (0.3)</b><br><b>0.0-67.1</b> |
| <i>Eye allergy (10015907)</i>                                    | <i>0 (0.0)</i><br><i>0.0-4.4</i>  | <i>1 (0.3)</i><br><i>0.0-67.1</i> |

In italics: predefined adverse events of interest (AEIs) listed on the adverse drug reaction (ADR) card

AE: adverse event; Any: at least one symptom experienced (regardless of the MedDRA preferred term) under the specified system organ class; COVID-19: coronavirus disease 2019; MedDRA: Medical Dictionary for Regulatory Activities; N: total number of participants vaccinated with GSK's inactivated quadrivalent seasonal influenza vaccine (IIV4) who received an ADR card; n (%): number (percentage) of participants vaccinated with GSK's IIV4 reporting the symptom at least once on their ADR card; NR: AEs that occurred in three or fewer cases were grouped to simplify the table, with the number of cases presented for each symptom and the total number (%) for each symptom, but not each individual 95% CI; 95% CI, LL-UL: 95% confidence interval (extended Clopper-Pearson exact CI for clustered data), lower limit-upper limit
